# Supplementary material for: Early Recurrence of Hepatocellular Carcinoma After Hepatectomy: Predictive Role of Whole-Tumor Iodine Density Histogram Features and Resection Margin Distance
Source: Research Square preprint supplement (doi:10.21203/rs.3.rs-7978947/v1), 2025-11-18
Supplement: Supplementary file 1 [file 3fcc7aba7348431786a5086e.docx]

**Collection of data**

The clinical data of patients were retrospectively collected, including: (1) general information: age, sex, body mass index (BMI), and etiology; (2) laboratory data: alpha-fetoprotein (AFP), albumin (ALB), total bilirubin (TB), alanine aminotransferase (ALT), aspartate aminotransferase (AST), gamma-glutamyl transferase (GGT), platelet count (P), neutrophil count (N), and lymphocyte count (L); (3) perioperative data: surgical approach (open or minimally invasive), extent of liver resection (major or minor hepatectomy), intraoperative blood loss (L), and postoperative adjuvant therapy (yes/no). Major and minor hepatectomies were defined as the resection of ≥3 and ≤2 hepatic segments, respectively[1]; (4) pathological data: maximum tumor diameter (MTD), tumor number (TN), tumor differentiation (poorly and undifferentiated tumors were classified as grade 3–4), microvascular invasion (MVI), satellite nodules, liver capsule invasion, intratumoral hemorrhage and/or necrosis, and liver cirrhosis.

In addition, the tumor burden score (TBS), systemic immune-inflammation index (SII), neutrophil-to-lymphocyte ratio (NLR), platelet-to-lymphocyte ratio (PLR), and albumin–bilirubin (ALBI) score were also calculated. The specific formulas are detailed as follows[2-4].

TBS2=MTD2+TN2；NLR=N/L；PLR= P/L；SII=P×N/L；ALBI score = 0.66×log[TB (μmol/L)]-0.085×[ALB (g/L)]。

**CT Protocol**

Patients were positioned in the supine position, and scanning was performed from the top of the liver to the level of the iliac crest. A conventional non-contrast CT scan was initially performed, followed by contrast-enhanced spectral imaging using the GSI (Gemstone Spectral Imaging) mode. Scanning parameters were as follows: tube voltage of 80/140 kVp with rapid switching (0.5 ms), tube current of 600 mA, rotation speed of 0.6 s/r, pitch of 1.375, collimator width of 0.625 mm × 64 mm, reconstruction mode Stnd with 30% ASiR, and a slice thickness and interval of 1.25 mm. Iodinated contrast agent (iopamidol, 320 mg/mL) was administered via an antecubital vein using a high-pressure injector at a rate of 3.5–4.0 mL/s (1.2 mL/kg). Arterial phase scanning was initiated 8 seconds after a trigger threshold of 100 HU was reached in the abdominal aorta at the level of the diaphragm. The portal venous and delayed phases were acquired 25 seconds and 90 seconds after the arterial phase, respectively.

**Table S1**. Definition of each CT imaging feature in this study.

| **CT imaging features** | **Definitions** |
| --- | --- |
| **Liver Characteristics**[1] |  |
| Cirrhosis | An irregular, nodular or shrunken liver, as well as ascites or evidence of portosystemic collaterals in decompensated stage. |
| Splenomegaly | CT transverse axis measurement of spleen diameter > 12 cm. |
| Gastroesophageal varices (GEVs) | Vascular structure ≥ 5 mm in diameter protruded into the lumen of the esophagus or stomach. |
| Spontaneous portosystemic shunt (SPSS) | SPSS is considered to be present when there are vascular structures ≥ 5 mm in diameter that connect the portal vein or splanchnic vein to the systemic venous system, mainly including paraumbilical and paraesophageal varices, gastro-renal shunts, splenorenal shunts, and shunts to other areas, excluding GEVs. |
| Ascites | Ascites was considered present if there was perihepatic, perisplenic, or midabdominal ascites, excluding a trace amount of ascites in the dependent portion. |
| **Tumor characteristics**[5] |  |
| Arterial peritumoral enhancement | Detectable portion of enhancement adjacent to the tumor border in the arterial phase, becoming iso-attenuating compared with background liver parenchyma in the delayed phase. |
| Tumor margin | Smooth margin, presenting as nodular tumor with smooth border, or non-smooth margin, presenting as nonnodular tumor with irregular contour. |
| Capsule appearance | Peripheral rim of uniform and smooth hyperenhancement in the portal venous or delayed phase. |
| Intratumoral necrosis | Non-enhancing areas with an attenuation similar to that of gallbladder contents. |
| Radiogenomic venous invasion (RVI) | RVl consists of three imaging features (internal arteries, hypodense halo, and tumor-liver difference) according to a three-trait decision tree.   - Internal arteries: the presence of discrete arteries within the tumor. - Hypodense halo: a rim of hypoattenuation partially or completely circumscribing the tumor. - Tumor-liver difference: a focal or circumferential sharp transition in attenuation between the tumor and the adjacent liver parenchyma in the absence of a hypodense halo. |

**References**

[1] HEO S, JEONG B, LEE S S, et al. CT-based detection of clinically significant portal hypertension predicts post-hepatectomy outcomes in hepatocellular carcinoma [J]. Eur Radiol, 2025.

[2] MODICA R, MINOTTA R, LICCARDI A, et al. Evaluation of Neutrophil-to-Lymphocyte Ratio (NLR), Platelet-to-Lymphocyte Ratio (PLR) and Systemic Immune-Inflammation Index (SII) as Potential Biomarkers in Patients with Sporadic Medullary Thyroid Cancer (MTC) [J]. J Pers Med, 2023, 13(6).

[3] WANG Y Y, ZHONG J H, SU Z Y, et al. Albumin-bilirubin versus Child-Pugh score as a predictor of outcome after liver resection for hepatocellular carcinoma [J]. Br J Surg, 2016, 103(6): 725-34.

[4] GUAN R, ZHENG Z, DENG M, et al. Assessment of Tumor Burden Score as a Feasible and Reliable Tool for Prognosis Prediction for Hepatocellular Carcinoma Undergoing Hepatectomy: A Multicenter, Retrospective Study [J]. Journal of hepatocellular carcinoma, 2025, 12: 247-60.

[5] JI G W, ZHU F P, XU Q, et al. Radiomic Features at Contrast-enhanced CT Predict Recurrence in Early Stage Hepatocellular Carcinoma: A Multi-Institutional Study [J]. Radiology, 2020, 294(3): 568-79.
