# Supplementary material for: Early Recurrence of Hepatocellular Carcinoma After Hepatectomy: Predictive Role of Whole-Tumor Iodine Density Histogram Features and Resection Margin Distance
Source: Research Square preprint supplement (doi:10.21203/rs.3.rs-7978947/v1), 2025-11-18
Supplement: Supplementary file 3 [file a6b283b585c875a69650db5b.docx]

**Table 1.** Baseline clinical characteristics of patients with HCC.

| Characteristic | ER- (n = 43) | ER+ (n = 42) | *P* Value |
| --- | --- | --- | --- |
| Patient demographics |  |  |  |
| Age, years | 56.00 (48.50, 59.50) | 58.50 (51.00, 64.00) | 0.112 |
| Sex, male | 36 (83.72) | 30 (71.43) | 0.174 |
| BMI, kg/m2 | 23.76 ± 2.68 | 23.25 ± 2.82 | 0.388 |
| Cause of disease |  |  | 0.414 |
| HBV | 35 (81.40) | 30 (71.43) |  |
| HCV | 2 (4.65) | 1 (2.38) |  |
| Others | 6 (13.95) | 11 (26.19) |  |
| Laboratory parameters |  |  |  |
| AFP, ≥400 ng/mL | 7 (16.28) | 13 (30.95) | 0.111 |
| ALT, U/L | 25.00 (17.50, 47.50) | 30.00 (22.25, 68.00) | 0.183 |
| AST, U/L | 34.00 (28.00, 47.00) | 36.00 (30.00, 61.50) | 0.322 |
| GGT, U/L | 49.00 (27.50, 69.50) | 53.50 (31.50, 122.75) | 0.280 |
| Cr, umol/L | 60.60 (57.10, 74.55) | 67.45 (59.78, 73.50) | 0.387 |
| PT, s | 12.70 (12.15, 13.80) | 12.20 (11.70, 13.07) | **0.031** |
| SII | 255.37 (167.81, 551.83) | 402.44 (166.74, 721.16) | 0.251 |
| NLR | 2.55 (2.00, 3.66) | 2.67 (1.94, 3.79) | 0.996 |
| PLR | 95.81 (68.07, 166.55) | 120.07 (86.16, 161.23) | 0.164 |
| MELD score | 8.87 (7.96, 10.51) | 8.08 (7.19, 9.72) | **0.038** |
| Child-pugh stage |  |  | 0.232 |
| A | 30 (69.77) | 34 (80.95) |  |
| B | 13 (30.23) | 8 (19.05) |  |
| BCLC stage |  |  | 0.694 |
| 0 | 4 (9.30) | 2 (4.76) |  |
| A | 39 (90.70) | 40 (95.24) |  |
| ALBI grade |  |  | 0.164 |
| 1 | 14 (32.56) | 22 (52.38) |  |
| 2 | 27 (62.79) | 19 (45.24) |  |
| 3 | 2 (4.65) | 1 (2.38) |  |
| Perioperative data |  |  |  |
| Type of operation, minimally invasive | 24 (55.81) | 18 (42.86) | 0.232 |
| Resection extent, major resection | 11 (25.58) | 16 (38.10) | 0.215 |
| Intraoperative blood loss, L | 0.20 (0.10, 0.35) | 0.30 (0.10, 0.50) | 0.269 |
| Postoperative adjuvant therapy, (+) | 13 (30.23) | 16 (38.10) | 0.375 |
| Pathological characteristics |  |  |  |
| TBS | 4.12 (2.69, 5.54) | 6.08 (5.10, 8.20) | **<.001** |
| Tumor differentiation, grade 3-4 | 4 (9.30) | 6 (14.29) | 0.707 |
| MVI, (+) | 13 (30.23) | 32 (76.19) | **<.001** |
| Hepatic capsular involvement, (+) | 7 (16.28) | 10 (23.81) | 0.386 |
| Satellite nodules, (+) | 10 (23.26) | 8 (19.05) | 0.635 |
| Tumor necrosis hemorrhage, (+) | 14 (32.56) | 10 (23.81) | 0.370 |
| Cirrhosis, (+) | 37 (86.05) | 33 (78.57) | 0.366 |
| Resection margin |  |  | **0.004** |
| WM, ≥1 | 27 (62.79) | 11 (26.19) |  |
| NM, ≥0.5 to ＜1 | 13 (30.23) | 25 (59.52) |  |
| ENM, ＜0.5 | 3 (6.98) | 6 (14.29) |  |

ER, early recurrence; BMI, body mass index; HBV, hepatitis B virus; HCV, hepatitis C virus; AFP, alpha-fetoprotein; ALT, alanine aminotransferase; AST, aspartate aminotransferase; GGT, gamma-glutamyl transferase; Cr, creatinine; PT, prothrombin time; SII, system immune-inflammation index; NLR, neutrophil-to-lymphocyte ratio; PLR, platelet-to-lymphocyte ratio; MELD, model for end-stage liver disease; BCLC, Barcelona Clinic Liver Cancer; ALBI, albumin-bilirubin; TBS, tumor burden score; MVI, microvascular invasion.

**Table 2.** CT imaging features, whole-tumor ID histogram parameters, and inter-observer variability among HCC patients.

| Characteristic | ER- (n = 43) | ER+ (n = 42) | *P* Value | ICC/K |
| --- | --- | --- | --- | --- |
| CT features |  |  |  |  |
| CSPH, (+) | 9 (20.93) | 16 (38.10) | 0.082 | 0.921 |
| Capsule appearance, complete | 13 (30.23) | 19 (45.24) | 0.153 | 0.823 |
| Tumor margin, nonsmooth | 20 (46.51) | 16 (38.10) | 0.432 | 0.841 |
| Arterial peritumoral enhancement, (+) | 8 (18.60) | 11 (26.19) | 0.401 | 0.811 |
| Intratumoral necrosis, (+) | 17 (39.53) | 19 (45.24) | 0.595 | 0.857 |
| RVI, (+) | 26 (60.47) | 31 (73.81) | 0.191 | 0.873 |
| Histogram parameters |  |  |  |  |
| Mean | 2015.97 ± 6.71 | 2019.55 ± 6.60 | **0.015** | 0.939 |
| SD | 5.72 (4.10, 6.58) | 5.91 (4.75, 7.17) | 0.210 | 0.835 |
| Min | 1993.72 ± 10.91 | 1992.86 ± 10.56 | 0.712 | 0.820 |
| Max | 2036.88 ± 9.55 | 2048.10 ± 13.34 | **<.001** | 0.851 |
| Variance | 32.68 (16.84, 43.32) | 34.86 (22.53, 51.38) | 0.208 | 0.836 |
| Skewness | 0.16 (0.09, 0.29) | 0.38 (0.15, 0.77) | **0.002** | 0.821 |
| Kurtosis | 0.37 (0.19, 0.62) | 0.68 (0.34, 1.50) | **0.005** | 0.819 |
| Entropy | 3.06 ± 0.32 | 3.14 ± 0.32 | 0.241 | 0.817 |
| 1th | 2003.02 ± 8.04 | 2004.31 ± 8.46 | 0.474 | 0.908 |
| 5th | 2006.91 ± 7.43 | 2009.31 ± 8.24 | 0.162 | 0.923 |
| 10th | 2008.84 ± 7.29 | 2011.57 ± 8.06 | 0.104 | 0.927 |
| 25th | 2012.33 ± 7.12 | 2015.12 ± 7.77 | 0.088 | 0.934 |
| 50th | 2016.00 ± 6.76 | 2018.95 ± 7.14 | 0.054 | 0.934 |
| 75th | 2019.70 ± 6.59 | 2023.19 ± 6.33 | **0.015** | 0.924 |
| 90th | 2023.02 ± 6.67 | 2026.83 ± 6.19 | **0.008** | 0.921 |
| 95th | 2025.00 ± 6.85 | 2029.19 ± 6.30 | **0.004** | 0.911 |
| 99th | 2028.93 ± 7.04 | 2034.17 ± 6.98 | **<.001** | 0.892 |

ID: iodine density; ER, early recurrence; CSPH, clinically significant portal hypertension; RVI, radiogenomic venous invasion; SD, standard deviation; ICC, intraclass correlation coefficient; K, kappa.

**Table 3.** Independent predictors of ER identified by multivariate Cox regression analysis.

| Variables | Univariate analyses | | | Multivariate analyses | | |
| --- | --- | --- | --- | --- | --- | --- |
| β | HR (95%*CI*) | *P* Value | β | HR (95%*CI*) | *P* Value |
| PT, s | -0.33 | 0.72 (0.55 ~ 0.94) | **0.016** |  |  |  |
| MELD score | -0.10 | 0.91 (0.79 ~ 1.04) | 0.165 |  |  |  |
| TBS | 0.24 | 1.27 (1.13 ~ 1.42) | **<.001** |  |  |  |
| MVI, (+) | 1.47 | 4.35 (2.12 ~ 8.92) | **<.001** | 1.11 | 3.05 (1.45 ~ 6.40) | **0.003** |
| Resection margin |  |  |  |  |  |  |
| WM, ≥1 |  | 1.00 (Reference) |  |  | 1.00 (Reference) |  |
| NM, ≥0.5 to ＜1 | 1.20 | 3.31 (1.62 ~ 6.77) | **0.001** | 0.81 | 2.24 (1.08 ~ 4.64) | **0.031** |
| ENM, ＜0.5 | 1.27 | 3.57 (1.31 ~ 9.77) | **0.013** | 1.25 | 3.48 (1.25 ~ 9.69) | **0.017** |
| Mean | 0.05 | 1.05 (1.01 ~ 1.10) | **0.017** |  |  |  |
| Max | 0.06 | 1.07 (1.04 ~ 1.09) | **<.001** | 0.06 | 1.06 (1.04 ~ 1.09) | **<.001** |
| Skewness | 0.62 | 1.86 (1.24 ~ 2.79) | 0.003 | 0.53 | 1.70 (1.05 ~ 2.77) | **0.032** |
| Kurtosis | 0.11 | 1.11 (1.03 ~ 1.20) | **0.005** |  |  |  |
| 75th | 0.05 | 1.05 (1.01 ~ 1.10) | **0.018** |  |  |  |
| 90th | 0.06 | 1.06 (1.02 ~ 1.11) | **0.007** |  |  |  |
| 95th | 0.06 | 1.06 (1.02 ~ 1.11) | **0.003** |  |  |  |
| 99th | 0.07 | 1.08 (1.04 ~ 1.12) | **<.001** |  |  |  |

ER, early recurrence; PT, prothrombin time; MELD, model for end-stage liver disease; TBS, tumor burden score; MVI, microvascular invasion; HR, hazard ratio; CI, confidence interval.

**Table 4.** RFS stratified by prognostic factors based on multivariate log-rank test.

| Variables | Number | Mean RFS (month) | *P* Value |
| --- | --- | --- | --- |
| MVI, (+) |  |  | **<.001** |
| Negative | 40 | 29.02 (23.80, 34.23) |  |
| Positive | 45 | 12.34 (8.67, 16.00) |  |
| Resection margin |  |  | **<.001** |
| WM, ≥1 | 38 | 28.41 (22.90, 33.92) |  |
| NM,≥0.5 to ＜1 | 32 | 15.42 (10.40, 20.43) |  |
| ENM,＜0.5 | 15 | 9.54 (3.95, 15.13) |  |
| Max* |  |  | **<.001** |
| ＜2041.00 | 39 | 26.13 (21.80, 30.46) |  |
| ≥2041.00 | 46 | 15.15 (10.01, 20.29) |  |
| Skewness* |  |  | **0.004** |
| ＜0.22 | 42 | 23.62 (18.87, 28.37) |  |
| ≥0.22 | 43 | 16.83 (11.56, 22.10) |  |

RFS, recurrence-free survival; MVI, microvascular invasion.

* Grouped according to the median value. Data are presented as the mean (95%*CI*).
